# Supplementary material for: First Insights on Resistance and Virulence Potential of Escherichia coli from Captive Birds of Prey in Portugal
Source: MDPI journal article supplement (doi:10.3390/antibiotics13050379), 2024-04-23
Supplement: s1 [file s1]

# First Insights on Resistance and Virulence Potential of *Escherichia coli* from Captive Birds of Prey in Portugal

Rita Magalhães <sup>1,2</sup>, Raquel Abreu <sup>1,2</sup>, Gonçalo Pereira <sup>1,2</sup>, Eva Cunha <sup>1,2,\*</sup>, Elisabete Silva <sup>1,2</sup>, Luís Tavares <sup>1,2</sup>, Lélia Chambel <sup>3</sup> and Manuela Oliveira <sup>1,2,4</sup>

<sup>1</sup> CIISA—Centre for Interdisciplinary Research in Animal Health, Faculty of Veterinary Medicine, University of Lisbon, 1300-477 Lisbon, Portugal; rita-magalhaes@edu.ulisboa.pt (R.M.); rmsilva@fmv.ulisboa.pt (R.A.); goncalopereira@fmv.ulisboa.pt (G.P.); elisabetsilva@fmv.ulisboa.pt (E.S.); ltavares@fmv.ulisboa.pt (L.T.); moliveira@fmv.ulisboa.pt (M.O.)

<sup>2</sup> AL4AnimalS—Associate Laboratory for Animal and Veterinary Sciences, 1300-477 Lisbon, Portugal

<sup>3</sup> BioISI—Biosystems and Integrative Sciences Institute, Faculty of Sciences, University of Lisbon, 1749-016 Lisbon, Portugal; lmchambel@ciencias.ulisboa.pt

<sup>4</sup> cE3c—Centre for Ecology, Evolution and Environmental Changes and CHANGE—Global Change and Sustainability Institute, Faculty of Sciences, University of Lisbon, 1749-016 Lisbon, Portugal

\* Correspondence: evacunha@fmv.ulisboa.pt

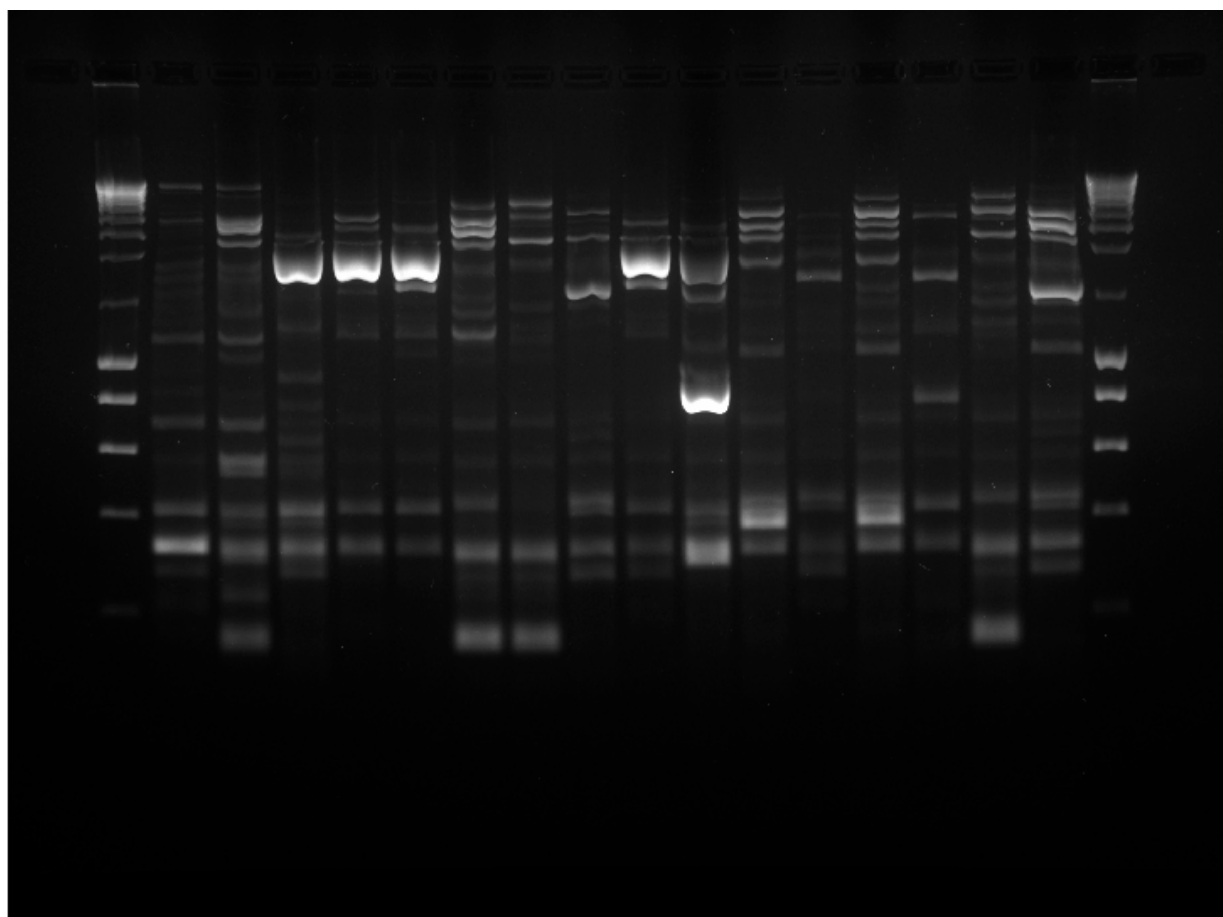

**Figure S1.** Full scan of the entire original gel in Figure 2 representing ERIC-PCR fingerprinting profiles of 16 *E. coli* isolates under study.

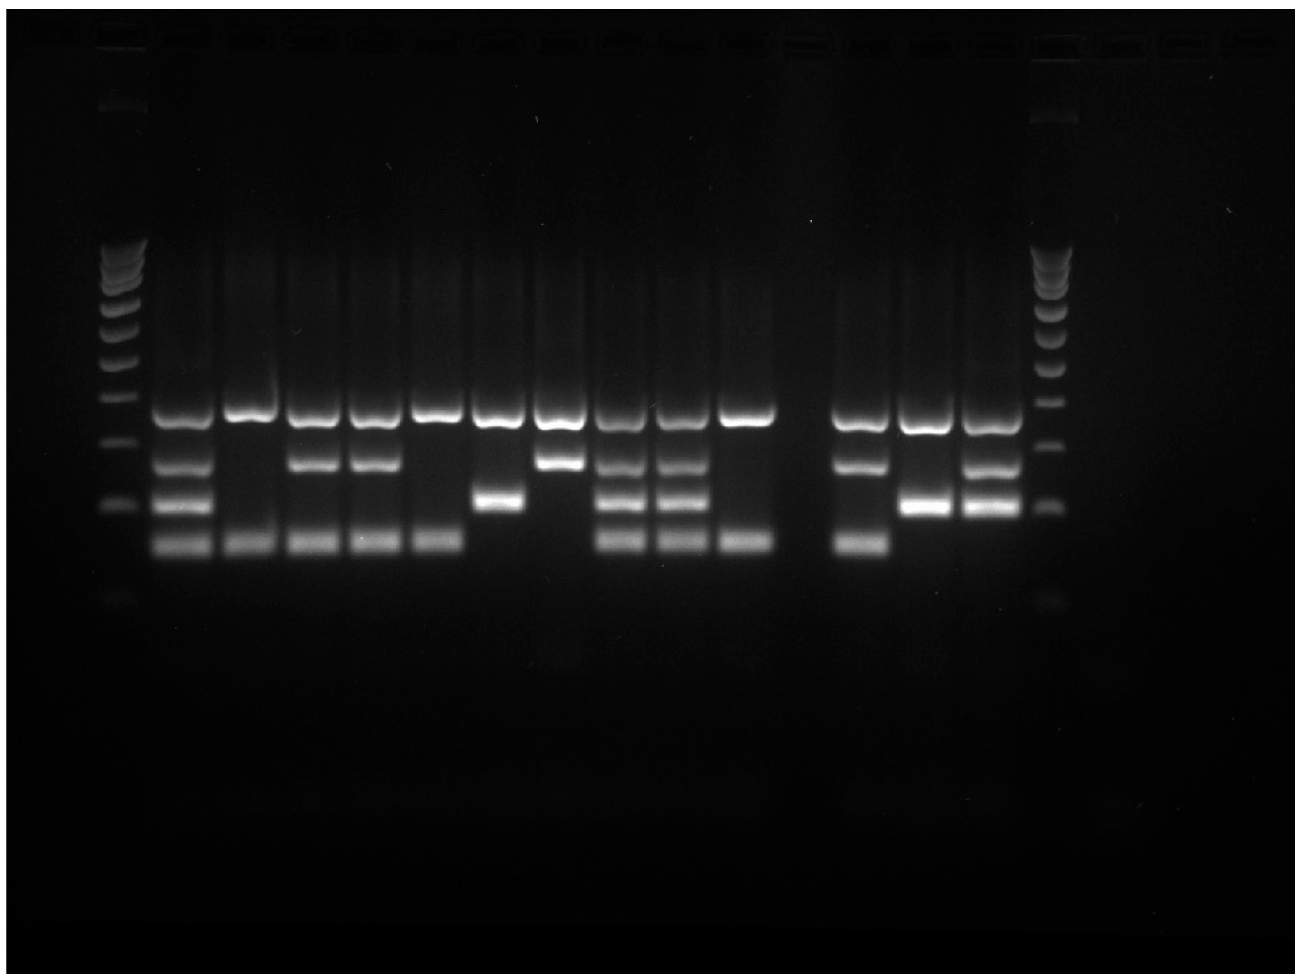

**Figure S2.** Full scan of the entire original gel in Figure 4 representing quadruplex PCR profiles of 10 *E. coli* isolates.

**Table S1.** Data on the sampled animals (n=27).

| Sample ID | Sex | Species                     | Age      | Collection Date | Sampling District |
|-----------|-----|-----------------------------|----------|-----------------|-------------------|
| 1         | F   | <i>Parabuteo unicinctus</i> | Adult    | 29/12/2022      | Lisboa            |
| 2         | F   | <i>Parabuteo unicinctus</i> | Adult    | 29/12/2022      | Lisboa            |
| 3         | M   | <i>Parabuteo unicinctus</i> | Adult    | 29/12/2022      | Lisboa            |
| 4         | M   | <i>Parabuteo unicinctus</i> | Juvenile | 29/12/2022      | Lisboa            |
| 5         | M   | <i>Parabuteo unicinctus</i> | Adult    | 29/12/2022      | Lisboa            |
| 6         | M   | <i>Parabuteo unicinctus</i> | Adult    | 08/01/2023      | Santarém          |
| 7         | M   | <i>Falco tinnunculus</i>    | Adult    | 08/01/2023      | Santarém          |
| 8         | F   | <i>Falco tinnunculus</i>    | Adult    | 08/01/2023      | Santarém          |
| 9         | ?   | <i>Bubo virginianus</i>     | Adult    | 08/01/2023      | Faro              |
| 10        | ?   | <i>Bubo bengalensis</i>     | Adult    | 08/01/2023      | Faro              |
| 11        | M   | <i>Bubo bubo</i>            | Adult    | 08/01/2023      | Faro              |
| 12        | ?   | <i>Tyto alba</i>            | Adult    | 08/01/2023      | Faro              |
| 13        | M   | <i>Bubo bubo</i>            | Adult    | 08/01/2023      | Faro              |
| 14        | M   | <i>Parabuteo unicinctus</i> | Adult    | 08/01/2023      | Faro              |
| 15        | F   | <i>Parabuteo unicinctus</i> | Adult    | 08/01/2023      | Faro              |
| 16        | M   | <i>Parabuteo unicinctus</i> | Juvenile | 08/01/2023      | Faro              |
| 17        | ?   | <i>Ptilopsis leucotis</i>   | Adult    | 08/01/2023      | Faro              |
| 18        | M   | <i>Uruba aura</i>           | Adult    | 08/01/2023      | Faro              |
| 19        | ?   | <i>Falco tinnunculus</i>    | Juvenile | 08/01/2023      | Faro              |
| 20        | F   | <i>Parabuteo unicinctus</i> | Adult    | 29/12/2022      | Lisboa            |
| 21        | M   | <i>Parabuteo unicinctus</i> | Juvenile | 29/12/2022      | Setúbal           |
| 22        | F   | <i>Bubo bubo</i>            | Juvenile | 29/12/2022      | Setúbal           |
| 23        | M   | <i>Bubo bubo</i>            | Adult    | 29/12/2022      | Setúbal           |
| 24        | F   | <i>Falco biarmicus</i>      | Juvenile | 29/12/2022      | Setúbal           |
| 25        | F   | <i>Falco tinnunculus</i>    | Juvenile | 29/12/2022      | Setúbal           |
| 26        | F   | <i>Tyto alba</i>            | Juvenile | 29/12/2022      | Setúbal           |
| 27        | F   | <i>Strix aluco</i>          | Adult    | 29/12/2022      | Setúbal           |

Female (F), Male (M), No data (?).

**Table S2.** Results of the Isolates' Virulence (n=84) and Resistance Profiles and Phylogenetic Group (n=33).

| Isolate | Virulence Profile |                 | Resistance Profile |                          |           | Phylogenetic Group |    |
|---------|-------------------|-----------------|--------------------|--------------------------|-----------|--------------------|----|
|         | Positive Results  | Virulence index | I                  | R                        | MAR index |                    |    |
| 1.3     | G; BW             | 0.333           | CL                 | -                        | 0         | Negative           | B2 |
| 2.1     | G; BM             | 0.333           | -                  | TE; DO                   | 0.222     | Negative           | B1 |
| 2.3     | G                 | 0.167           | CL; ENR            | PRL                      | 0.111     | Negative           | D  |
| 3.1     | G                 | 0.167           | CL; ENR            | -                        | 0         | Negative           | D  |
| 3.4     | G                 | 0.167           | AMC; CL            | TE; ENR; M; DO; SXT; PRL | 0.667     | Negative           | B1 |
| 5.2     | G                 | 0.167           | -                  | PRL                      | 0.111     | Negative           | A  |
| 6.1     | G; BW             | 0.333           | -                  | -                        | 0         | Negative           | D  |
| 6.2     | G; BS             | 0.333           | AMC                | TE; CL; DO; PRL          | 0.444     | Negative           | B2 |
| 6.4     | G                 | 0.167           | ENR                | TE; CL; DO; PRL          | 0.444     | Negative           | B2 |
| 8.1     | G; BM             | 0.333           | AMC; CL            | -                        | 0         | Negative           | B1 |
| 11.3    | G; BM             | 0.333           | CL                 | -                        | 0         | Negative           | B1 |
| 12.2    | G; BW             | 0.333           | -                  | -                        | 0         | Negative           | D  |
| 12.3    | G; BS             | 0.333           | CL                 | PRL                      | 0.111     | Negative           | B2 |
| 13.1    | -                 | 0               | AMC; CL            | ENR; M; PRL              | 0.333     | Negative           | D  |
| 13.4    | G; BW             | 0.333           | -                  | TE; DO; PRL              | 0.333     | Negative           | A  |
| 14.1    | G; BS             | 0.333           | CL                 | -                        | 0         | Negative           | B2 |
| 14.2    | G; BS             | 0.333           | CL                 | -                        | 0         | Negative           | B2 |
| 14.3    | G; BS             | 0.333           | -                  | -                        | 0         | Negative           | B2 |
| 15.2    | G; BM             | 0.333           | CL                 | -                        | 0         | Negative           | B1 |
| 15.3    | G                 | 0.167           | CL                 | TE; ENR; M; DO; SXT; PRL | 0.667     | Negative           | D  |
| 16.1    | G                 | 0.333           | -                  | CL; PRL                  | 0.222     | Positive           | D  |
| 16.4    | G                 | 0.333           | -                  | CL; PRL                  | 0.222     | Positive           | D  |
| 17.2    | G                 | 0.167           | ENR                | TE; DO; SXT; PRL         | 0.444     | Negative           | A  |
| 17.4    | G                 | 0.167           | DO                 | TE; SXT; PRL             | 0.333     | Negative           | A  |
| 18.2    | G; BS             | 0.333           | CL                 | TE; DO                   | 0.222     | Negative           | B1 |
| 19.3    | H; G; BS          | 0.500           | AMC; CL            | TE; DO; CN; PRL          | 0.444     | Negative           | B1 |
| 21.2    | G                 | 0.167           | CL                 | -                        | 0         | Negative           | B1 |
| 21.3    | G                 | 0.167           | -                  | TE; DO                   | 0.222     | Negative           | B2 |
| 22.1    | H; G              | 0.333           | ENR                | -                        | 0         | Negative           | D  |
| 26.1    | H; G              | 0.333           | CL                 | -                        | 0         | Negative           | D  |
| 26.2    | H                 | 0.167           | CL                 | -                        | 0         | Negative           | D  |
| 26.3    | H                 | 0.167           | CL                 | -                        | 0         | Negative           | D  |
| 27.3    | H                 | 0.167           | CL                 | -                        | 0         | Negative           | B2 |

Haemolysin production (H); Gelatinase activity (G); Biofilm weak production (BW); Biofilm moderate production (BM); Biofilm strong production (BS); Resistance (R); Intermediate susceptibility (I); Tetracycline (TE); Gentamicin (CN); Amoxicillin/Clavulanic Acid (AMC), Cephalexin (CL), Enrofloxacin (ENR), Trimethoprim/Sulfamethoxazole (SXT); Piperacillin (PRL); Doxycycline (DO); Marbofloxacin (M); Extended Spectrum  $\beta$ -Lactamase production (ESBL); Not found (-).
